# Supplementary material
Source: ML conference proceedings conference paper supplement (https://proceedings.mlr.press/v189/su23a.html)
Supplement: Supplementary file 1 [file su23a-supp.pdf]

## Appendix A. Omitted Proofs

### A.1. Proof of Theorem 1

**Proof** Before we start our proof, we give the definition of  $LR_S$  oracle and  $STAT_{\mathcal{P}}(\tau)$  oracle to prepare the readers for the proof.  $LR_S$  oracle is based on the local randomizer which is defined as follows:

**Definition 23** ( *$\epsilon$ -local randomizer*) An  $\epsilon$ -local randomizer  $\mathcal{R} : Z \rightarrow W$  is a randomized algorithm that  $\forall z_1, z_2 \in Z$  and  $\forall w \in W$ , it satisfies:

$$Pr[\mathcal{R}(z_1) = w] \leq e^\epsilon [\mathcal{R}(z_2) = w]$$

**Definition 24** ( *$LR_S$  oracle* [Kasiviswanathan et al. \(2011\)](#)) For a dataset  $S \in Z^n$ , an  $LR_S$  oracle takes an index  $i$  and a local randomizer  $\mathcal{R}$  as inputs and outputs a random value  $w$  obtained by applying  $\mathcal{R}(z_i)$ .

And we recall the definition of statistical queries.

**Definition 25** Let  $\mathcal{P}$  be an distribution over a domain  $Z$  and  $\tau > 0$ . A statistical query oracle  $STAT_{\mathcal{P}}(\tau)$  is an oracle that given any function  $\phi : Z \rightarrow [-1, 1]$  as input, the statistical query oracle returns some value  $v$  such that  $|v - \mathbb{E}_{z \sim \mathcal{P}}[\phi(z)]| \leq \tau$ .

Now we formally begin our proof. First, we prove that the algorithm given in [Daniely and Feldman \(2019\)](#) uses the same number of private data and public data. The core idea of the algorithm in [Daniely and Feldman \(2019\)](#) is that: when using the projected gradient descent to find a vector  $w$  that satisfies  $Pr_{(x,y) \sim \mathcal{P}}[y \neq \text{sign}(\langle \hat{w}, x \rangle)] \leq \alpha$ , the objective function can be decomposed as  $F(w) = F_1(w) + F_2(w)$ , where the (sub-)gradient of  $F_1(w)$  (namely  $\nabla F_1(w)$ ) is just a function of  $x$  while the gradient of  $F_2(w)$  (namely  $\nabla F_2(w)$ ) is independent of  $w$ . As a result, (sub-)gradient  $\nabla F(w)$  can be computed non-interactively by calculating  $\nabla F_1(w)$  with only public unlabeled data and calculating  $\nabla F_2(w)$  with non-interactive statistic queries because  $\nabla F_2(w)$  doesn't depend on  $w$ . So to make this algorithm achieve the PAC learning error  $\alpha$ , the sample complexity of the private data and the public data should be the same. For more details, please refer to the proof of Lemma 4.3 in [Daniely and Feldman \(2019\)](#). So, to prove our theorem, we only have to prove that the sample complexity of the private data is  $\tilde{O}(\frac{d^{10} \log(1/\beta)}{\epsilon^2 \gamma^{12} \alpha^6})$ .

In the following, we give the private sample complexity of the algorithm in [Daniely and Feldman \(2019\)](#), which can be directly derived from the following two lemmas.

The first Lemma states that a statistic query oracle  $STAT_{\mathcal{P}}(\tau)$  can be simulated with success probability  $1 - \beta$  by  $\epsilon$ -LDP algorithm using  $LR_S$  oracle.

**Lemma 26** [Kasiviswanathan et al. \(2011\)](#) Let  $\mathcal{A}_{SQ}$  be an algorithm that makes at most  $t$  queries to  $STAT_{\mathcal{P}}(\tau)$  oracle. Then for any  $\epsilon > 0$  and  $\beta > 0$ , there is an  $\epsilon$ -LDP algorithm  $\mathcal{A}_{priv}$  that uses  $LR_S$  oracle for  $S$  containing  $n = O(\frac{t \log(\frac{t}{\beta})}{(\epsilon\tau)^2})$  i.i.d. samples from  $\mathcal{P}$  and produces the same output as  $\mathcal{A}_{SQ}$  with probability at least  $1 - \beta$ . Further, if  $\mathcal{A}_{SQ}$  is non-interactive then  $\mathcal{A}_{priv}$  is non-interactive.

The next lemma claims the existence a NLDP algorithm  $\mathcal{A}_{SQ}$  that achieves PAC learning error  $\alpha$  for any arbitrary  $\alpha \in (0, 1)$ .

**Lemma 27 (Lemma 4.3 in Daniely and Feldman (2019))** *Let  $\mathcal{P}$  be a distribution on  $\mathcal{B}_2^d \times \{\pm 1\}$  such that there is a vector  $w^* \in \mathcal{B}_2^d$  satisfying  $\Pr_{(x,y) \sim \mathcal{P}}[y \langle w^*, x \rangle \geq \gamma] = 1$ . Then there is a non-interactive algorithm  $\mathcal{A}_{SQ}$  that for every  $\alpha \in (0, 1)$ , it uses  $O(\frac{d^4}{\gamma^4 \alpha^2})$  queries to  $\text{STAT}_{\mathcal{P}}(\Omega(\frac{\gamma^4 \alpha^2}{d^3}))$  and finds a vector  $\hat{w}$  such that  $\Pr_{(x,y) \sim \mathcal{P}}[y \neq \text{sign}(\langle \hat{w}, x \rangle)] \leq \alpha$ .*

Lemma 27 indicates that if we can find a non-interactive algorithm  $\mathcal{A}_{SQ}$  that makes at most  $t$  queries to  $\text{STAT}_{\mathcal{P}}(\tau)$  oracle, then with probability  $1 - \beta$ , the existence of an  $\epsilon$ -NLDP algorithm  $\mathcal{A}_{priv}$  is guaranteed using  $n = O(\frac{t \log(\frac{t}{\beta})}{(\epsilon \tau)^2})$  private data. So, by substituting  $t = O(\frac{d^4}{\gamma^4 \alpha^2})$  and  $\tau = \Omega(\frac{\gamma^4 \alpha^2}{d^3})$  in Lemma 26, the sample complexity of public data is straight forward. ■

## A.2. Proof of Lemma 13

**Proof** To proof Lemma 13, we first study the excess empirical risk with the hinge loss  $\ell(w, (x, y)) = \max\{0, 1 - y \langle w, x \rangle\}$  of the output  $w_t$  of the algorithm  $\mathcal{H}_{priv}(\frac{1}{32R}, \epsilon, \delta, \tilde{S}_t)$ . First, we recall the following result of  $\mathcal{H}_{priv}(\alpha, \epsilon, \delta, S)$  if each  $\|x_i\|_2 \leq 1, |y_i| \leq 1$ .

**Lemma 28 (Theorem 30 in Wang et al. (2020))** *For any  $0 < \epsilon, \delta < 1$ , if each  $\|x_i\|_2 \leq 1, |y_i| \leq 1$  for all  $i \in [n]$ ,  $\mathcal{H}_{priv}(\alpha, \epsilon, \delta, S)$  is  $(\epsilon, \delta)$ -NLDP. Moreover, for any error  $\alpha \in (0, 1)$ , if the size of dataset  $n$  is sufficiently large such that  $n \geq \tilde{\Omega}(\frac{C^p p^{6p} d}{\epsilon^{4p+4} \alpha})$  with  $p = O(\frac{1}{\alpha^3})$ . Then the output  $w_n$  satisfies*

$$\mathbb{E}[\frac{1}{n} \sum_{i=1}^n \max\{0, \frac{1}{R} - y \langle w, x \rangle\}] - \min_{\|w\|_2 \leq 1} \frac{1}{n} \sum_{i=1}^n \max\{0, \frac{1}{R} - y \langle w, x \rangle\} \leq \alpha, \quad (1)$$

where  $C > 0$  is a constant<sup>3</sup> and the expectation is taken over the internal randomness of the algorithm.

Note that in we need to assume  $\|x_i\|_2 \leq 1$  in Lemma 28 while in our setting  $\|x_i\|_2 \leq R$ . Thus, we need to normalize the data to  $\tilde{S}_t$  first and revoke  $\mathcal{H}_{priv}(\frac{1}{32R}, \epsilon, \delta, \tilde{S}_t)$ . By Lemma 28 we have when  $\frac{n}{k} \geq \tilde{\Omega}(d \text{Poly}(\frac{1}{\epsilon}, \log \frac{1}{\delta}))$

$$\mathbb{E}[\hat{L}(w_t, \tilde{S}_t)] - \min_{\|w\|_2 \leq 1} \hat{L}(w, \tilde{S}_t) \leq \frac{1}{32R}, \quad (2)$$

where  $\hat{L}(w_t, \tilde{S}_t) = \frac{1}{|\tilde{S}_t|} \sum_{(x_i, y_i) \in \tilde{S}_t} \max\{0, \frac{1}{R} - y_i \langle w, \frac{x_i}{R} \rangle\}$ . Thus, we have the following result via multiplying  $R$  in both side of (2).

**Lemma 29** *When  $n \geq \tilde{\Omega}(dk \text{Poly}(\frac{1}{\epsilon}, \log \frac{1}{\delta}))$ , each  $w_t = \mathcal{H}_{priv}(\frac{1}{32R}, \epsilon, \delta, \tilde{S}_t)$  for  $t \in [k]$  satisfies*

$$\mathbb{E}[\hat{L}(w_t, S_t)] - \min_{\|w\|_2 \leq 1} \hat{L}(w_t, S_t) \leq \frac{1}{32}, \quad (3)$$

where  $\hat{L}(w_t, S_t)$  is the empirical risk of  $\ell(w, (x, y)) = \max\{0, 1 - y \langle w, x \rangle\}$ , and the expectation is taken over the internal randomness of the algorithm.

3. Note that Wang et al. (2020) only showed the case where  $R = 2$ . However, it is obvious to extend to the general  $R$  with the same proof.

The following lemma transforms the excess empirical risk in Lemma 29 to classification error.

**Lemma 30** *Under the assumptions in Theorem 11, then for any  $t \in [k]$ ,  $\beta \in (0, 1)$ , with probability at least  $1 - \frac{\beta}{2}$ , the following holds when  $n \geq \tilde{\Omega}(dk \text{Poly}(\frac{1}{\epsilon}, \log \frac{1}{\delta}))$  with  $k = O(\log \frac{1}{\beta})$ .*

$$\mathbb{E}[\text{err}_{\mathcal{P}}(h_{w_t})] \leq \frac{1}{8}$$

where the expectation is taken over the random choice of the data in  $D$  and the internal randomness of  $\mathcal{H}_{\text{priv}}$ .

**Proof [Proof of Lemma 30]** We need the following lemma for our proof.

**Lemma 31 (Anthony and Bartlett (2009))** *Let  $\mathcal{H}$  be the set of  $\{\pm 1\}$ -valued functions defined on a set  $\mathcal{X}$  and  $\mathcal{P}$  is a probability distribution on  $Z = \mathcal{X} \times \{\pm 1\}$ . For  $\eta \in (0, 1)$ ,  $\zeta > 0$ ,  $\Pr_{z \sim \mathcal{P}^n} [\exists h \in \mathcal{H} : \text{err}_{\mathcal{P}}(h) > (1 + \zeta)\text{err}_z(h) + \eta] \leq 4\tau_{\mathcal{H}}(2n)e^{-\frac{\eta\zeta n}{4(\zeta+1)}}$ , where  $\text{err}_{\mathcal{P}}(h)$  is the population error,  $\text{err}_z(h)$  is the empirical error on sample set  $z$  and  $\tau_{\mathcal{H}}(\cdot)$  is the growth function of  $\mathcal{H}$ . If  $\mathcal{H}$  is the hypothesis set of learning halfspaces, then  $\tau_{\mathcal{H}}(2n) \leq (2n)^{d+1} + 1$  with  $d$  being the dimension of set  $\mathcal{X}$ .*

The following proof applies for any  $t \in [k]$ :

Based on our assumption, the halfspace is separable, so we know that  $\min_{\|w\|_2 \leq 1} \hat{L}(w, S_t) = 0$ . Since hinge loss is a convex surrogate for 0 – 1 loss, we can get that

$\mathbb{E}[\text{err}_{S_t}(h_{w_t})] \leq \mathbb{E}[\hat{L}(w_t, S_t)] \leq \min_{\|w\|_2 \leq 1} \hat{L}(w, D) + \frac{1}{32} = \frac{1}{32}$ , where the second inequality comes from (3).

Setting  $\eta = \frac{1}{16}$  and  $\zeta = 1$ , for any  $t \in [k]$ , denoting  $n_t = |S_t|$ , then according to Lemma 31, we can get

$$\Pr_{S_t \sim \mathcal{P}^{n_t}} \{ \exists h_{w_t} \in \mathcal{H} : \mathbb{E}[\text{err}_{\mathcal{P}}(h_{w_t})] > 2 \cdot \frac{1}{32} + \frac{1}{16} \} \leq 4\tau_{\mathcal{H}}(2n_t)e^{-\frac{n_t}{128}}. \quad (4)$$

When  $n_t = \tilde{\Omega}(d \log \frac{1}{\beta} \text{Poly}(\log \frac{1}{\delta}, \frac{1}{\epsilon}))$ , we have  $4\tau_{\mathcal{H}}(2n_t)e^{-\frac{n_t}{128}} \leq \frac{\beta}{2k}$ . Then (4) will become

$$\Pr_{S_t \sim \mathcal{P}^{n_t}} \{ \exists h_{w_t} \in \mathcal{H} : \mathbb{E}[\text{err}_{\mathcal{P}}(h_{w_t})] > \frac{1}{8} \} \leq \frac{\beta}{2k}.$$

Thus, take the union bound, we have with probability at least  $1 - \frac{\beta}{2}$  for any  $t \in [k]$ ,

$$\mathbb{E}[\text{err}_{\mathcal{P}}(h_{w_t})] \leq \frac{1}{8}.$$

■

According to Lemma 30, for any  $t \in [k]$ , with probability at least  $1 - \frac{\beta}{2}$ , we have

$$\mathbb{E}_{D, \mathcal{H}_{\text{priv}}}[\text{err}_{\mathcal{P}}(h_{w_t})] = \mathbb{E}_{D, \mathcal{H}_{\text{priv}}} \left\{ \Pr_{(x,y) \sim \mathcal{P}} [h_{w_t}(x) \neq y] \right\} \leq \frac{1}{8}.$$

Applying Hoeffding inequality, we have

$$\begin{aligned}
Pr_{(x,y)\sim\mathcal{P}}\{Pr_{(x,y)\sim\mathcal{P}}[\hat{f}(x)\neq y] - \frac{1}{8} > \frac{1}{4}\} &\leq Pr\left\{\frac{1}{k}\sum_{t=1}^k Pr_{(x,y)\sim\mathcal{P}}[h_{w_t}(x)\neq y] - \frac{1}{8} > \frac{1}{16}\right\} \\
&\leq Pr\left\{\left|\frac{1}{k}\sum_{t=1}^k Pr_{(x,y)\sim\mathcal{P}}[h_{w_t}(x)\neq y] - \frac{1}{8}\right| > \frac{1}{16}\right\} \leq 2e^{-\frac{k}{32}}
\end{aligned}$$

For the first inequality, denote the event  $E_1 = \{Pr_{(x,y)\sim\mathcal{P}}[\hat{f}(x)\neq y] - \frac{1}{8} > \frac{1}{4}\}$  and event  $E_2 = \{\frac{1}{k}\sum_{t=1}^k Pr_{(x,y)\sim\mathcal{P}}[h_{w_t}(x)\neq y] - \frac{1}{8} > \frac{1}{16}\}$ . Thus, the first inequality holds if  $E_1 \subseteq E_2$ .  $E_1$  claims that with probability at least  $\frac{3}{8}$  the classifier  $\hat{f}$  will give wrong prediction. That is more than half of  $\{w_t\}_{t=1}^k$  give wrong predictions. Thus,  $\frac{1}{k}\sum_{t=1}^k Pr_{(x,y)\sim\mathcal{P}}[h_{w_t}(x)\neq y] \geq \frac{\frac{k}{2}\times\frac{3}{8}}{k} = \frac{3}{16}$ . The second inequality is due to  $\mathbb{E}\{\frac{1}{k}\sum_{t=1}^k Pr_{(x,y)\sim\mathcal{P}}[h_{w_t}(x)\neq y]\} \leq \frac{1}{8}$ .

When  $k = O(\log(\frac{1}{\beta}))$ , we have

$$Pr_{(x,y)\sim\mathcal{P}}\{Pr_{(x,y)\sim\mathcal{P}}[\hat{f}(x)\neq y] > \frac{3}{16}\} \leq \frac{\beta}{2}$$

Therefore, with probability at least  $1 - \frac{\beta}{2} - \frac{\beta}{2} = 1 - \beta$ , we have

$$Pr_{(x,y)\sim\mathcal{P}}[\hat{f}(x)\neq y] \leq \frac{3}{16}$$

■

### A.3. Proof of Theorem 21

The proof of this theorem can be induced directly by the following two lemmas. The first lemma claims that Logistic Loss-NLDP outputs a classifier  $w^{priv}$  which is NLP and achieves a constant classification error  $C_{err}$  using  $O(d\text{Poly}(\frac{1}{\epsilon}))$  private samples.

**Lemma 32** *Algorithm 3 is  $(\epsilon, \delta)$ -NLDP and  $w^{priv}$  satisfies the following when  $n = O(d\text{Poly}(\frac{1}{\epsilon}))$*

$$err_{\mathcal{P}}(h_{w^{priv}}) \leq \frac{r^2}{144U}.$$

The second lemma claims that STWN (Algorithm 4) transforms a weak learner that achieves a constant classification error to a strong learner that achieves a classification error arbitrarily close to the Bayes-optimal error using only unlabeled samples.

**Lemma 33** *Frei et al. (2021) If  $(x, y) \sim \mathcal{P}$  is a mixture distribution with mean  $\mu$  satisfying  $\|\mu\|_2 = \Theta(1)$  and  $K, U, r > 0$ , assume  $\ell$  is well behaved for some  $C_{\bar{\ell}} \geq 1$  and the temperature satisfies*

$\sigma \geq R \vee \|\boldsymbol{\mu}\|_2$ . Assume access to a pseudo labeler  $w_{pl}$  which achieves classification error less than  $\frac{R^2}{72C_{\tilde{\ell}}U}$ , i.e.,  $\text{err}_{\mathcal{P}}(h_{w_{pl}}) \leq \frac{R^2}{72C_{\tilde{\ell}}U}$ . Let  $\alpha, \beta \in (0, 1)$ ,  $B = \Omega\left(\frac{\log(\frac{1}{\beta})}{\alpha}\right)$ ,  $T = \tilde{\Omega}\left(\frac{d^2(\log(\frac{1}{\beta}))}{\alpha}\right)$  and step size  $\eta = \tilde{\Theta}\left(\frac{\alpha}{d(\log(\frac{1}{\beta}))^2}\right)$ , running STWN (Algorithm 4) with  $T \times B$  unlabeled samples, then with probability at least  $1 - \beta$ , there exists  $t^* < T$  such that  $\text{err}_{\mathcal{P}}(h_{w(t^*)}) \leq \text{err}_{\mathcal{P}}(h_{\boldsymbol{\mu}}) + \alpha$  where  $\text{err}_{\mathcal{P}}(h_{\boldsymbol{\mu}})$  is the error of Bayes-optimal classifier.

In particular, let  $B = O\left(\frac{\log(\frac{1}{\beta})}{\alpha}\right)$ ,  $T = \tilde{O}\left(\frac{d(\log(\frac{1}{\beta}))^2}{\alpha}\right)$ , above conclusion holds using  $T \times B = \tilde{O}\left(\frac{d(\log(\frac{1}{\beta}))^3}{\alpha}\right)$  unlabeled data samples.

**Proof of Theorem 21:** Since in Algorithm 3 we use the logistic function as the well behaved loss, we have  $C_{\tilde{\ell}} = 2$ . Moreover, under our assumption, the Bayes-optimal classifier is just  $w^*$  and thus  $\text{err}_{\mathcal{P}}(h_{\boldsymbol{\mu}}) = 0$ . Combing with Lemma 32 and Lemma 33 we finish the proof.

**Proof [Proof of Lemma 32]** To prove the lemma, we need the following lemma claiming the excess population loss of the output of Logistic Loss-NLDP:  $\mathcal{T}_{priv}(\alpha, R, \epsilon, \delta, D)$

**Lemma 34 (Theorem 6 in Zheng et al. (2017))** For any  $0 < \epsilon, \delta \leq 1$ , if each  $\|x_i\|_2 \leq R$  and  $y \in \{-1, 1\}$  for all  $i \in [n]$ , and  $\mathcal{W} = \{w : \|w\|_2 \leq \rho\}$ ,  $\mathcal{T}_{priv}(\alpha, R, \rho, \epsilon, \delta, D)$  is  $(\epsilon, \delta)$ -NLDP. Moreover, for any given error  $\alpha \in (0, 1)$ , if the size of dataset  $n$  is sufficiently large such that

$$n \geq \tilde{\Omega}\left(\left(\frac{8R\rho}{\alpha}\right)^{4R\rho \ln \ln \frac{8R\rho}{\alpha}} \left(\frac{4R\rho}{\epsilon}\right)^{2cR\rho \ln \frac{8R\rho}{\alpha} + 2} \frac{1}{\alpha^2 \epsilon^2}\right).$$

Then the output  $w_n$  satisfies  $\mathbb{E}[L(w^{priv})] - \min_{w \in \mathcal{W}} L(w) \leq \alpha$ , where  $L(w^{priv})$  is the population risk of the logistic loss, i.e.,  $L(w) = \mathbb{E}_{(x,y) \sim \mathcal{P}}[\ell(w; x, y)]$ , where  $\ell(w; x, y) = \log(1 + e^{-y\langle x, w \rangle})$ .

Apply the above Lemma 34 with  $\alpha = \frac{C_{err} \log 2}{2} = \frac{\log 2r^2}{144U}$  and  $\rho = \|\boldsymbol{\mu}\|_2$ . Then using  $n = O(d\text{Poly}(\frac{1}{\epsilon}))$  private samples,  $w^{priv}$  achieves the excess population loss no more than  $\frac{\log 2r^2}{144U}$ , i.e.,  $\mathbb{E}[L(w^{priv})] - \min_{\|w\|_2 \leq \|\boldsymbol{\mu}\|_2} \frac{\mathbb{E}[L(w)] \leq C_{err} \log 2}{2}$ . Since  $\|\boldsymbol{\mu}\|_2 \in \mathcal{W}$ , thus,

$$\mathbb{E}[L(w^{priv})] \leq \mathbb{E}[L(\boldsymbol{\mu})] + \frac{C_{err} \log 2}{2}.$$

For the term of  $\mathbb{E}[L(\boldsymbol{\mu})]$ , recall the following lemma.

**Lemma 35 (Lemma B.3 in Frei et al. (2021))** Consider the logistic function  $\ell(z) = \log(1 + e^{-z})$ . Let  $(x, y) \sim \mathcal{P}$  be a mixture distribution with mean  $\boldsymbol{\mu}$  and parameters  $K, U, R = \Theta(1) > 0$ . Then if  $\|\boldsymbol{\mu}\|_2 \geq 64K^2$  we have

$$\mathbb{E}_{(x,y) \sim \mathcal{P}}[\ell(y\langle w, x \rangle)] \leq \exp\left(-\frac{\|\boldsymbol{\mu}\|_2}{3K}\right). \quad (5)$$

By using the previous lemma, we have

$$\mathbb{E}[L(w^{priv})] \leq \exp\left(-\frac{\|\boldsymbol{\mu}\|_2}{3K}\right) + C_{err} \log 2/2 \leq C_{err} \log 2,$$

where the last inequality is due to the assumption of  $\|\boldsymbol{\mu}\|_2 \geq 3K \log(8/C_{err})$ . Thus we have

$$\begin{aligned}
Pr[y \neq \text{sign}(\langle w^{priv}, x \rangle)] &= Pr[y \cdot \langle w^{priv}, x \rangle < 0] = Pr[\ell(y \cdot \langle w^{priv}, x \rangle) > \ell(0)] \\
&\leq \frac{\mathbb{E}[\ell(y \cdot \langle w^{priv}, x \rangle)]}{\ell(0)} = \frac{\mathbb{E}[L(w^{priv})]}{\ell(0)} \leq \frac{r^2}{144U}
\end{aligned}$$

where we use the monotonicity of the loss function and Markov's inequality. ■

## Appendix B. Details of Hinge Loss-LDP and Logistic Loss-NLDP

---

**Algorithm 5** Hinge Loss-NLDP:  $\mathcal{H}_{priv}(\alpha, \epsilon, \delta, S)$

---

**Input:** Private data  $S = \{(x_i, y_i)\}_{i=1}^n \in \mathbb{R}^d \times \{\pm 1\}$ , where  $\|x_i\|_2 \leq 1, \|y_i\|_2 \leq 1$ ; Privacy parameters  $\epsilon, \delta$ ; Error  $\alpha$ .

1: Denote  $P_p(x) = \sum_{j=0}^p c_j \binom{p}{j} x^j (1-x)^{p-j}$  as the  $p$ -th order Bernstein polynomial for the function

$$f'_\beta, \text{ where } c_i = f'_\beta\left(\frac{i}{p}\right) \text{ and } f_\beta(x) = \frac{\frac{1}{R}-x + \sqrt{(\frac{1}{R}-x)^2 + \beta^2}}{2} \text{ with } \beta = \frac{\alpha}{4} \text{ and } p = \frac{2}{\beta^2 \alpha}.$$

\ \ The local user side:

2: **for**  $i \in [n]$  **do**

3:   Set  $\sigma_{i,0} \sim \mathcal{N}\left(0, \frac{32 \log(1.25/\delta)}{\epsilon^2} \mathbf{I}_d\right)$  and  $z_{i,0} \sim \mathcal{N}\left(0, \frac{32 \log(1.25/\delta)}{\epsilon^2}\right)$

4:   Set  $x_{i,0} = x_i + \sigma_{i,0}$  and  $y_{i,0} = y_i + z_{i,0}$

5:   **for**  $j \in [p(p+1)]$  **do**

6:      $x_{i,j} = x_i + \sigma_{i,j}$ , where  $\sigma_{i,j} \sim \mathcal{N}\left(0, \frac{8 \log(1.25/\delta) p^2 (p+1)^2}{\epsilon^2} \mathbf{I}_d\right)$

7:      $y_{i,j} = y_i + z_{i,j}$ , where  $z_{i,j} \sim \mathcal{N}\left(0, \frac{8 \log(1.25/\delta) p^2 (p+1)^2}{\epsilon^2}\right)$

8:   **end for**

9:   Send  $\{x_{i,j}\}_{j=0}^{p(p+1)}$  and  $\{y_{i,j}\}_{j=0}^{p(p+1)}$  to the server.

10: **end for**

\ \ The server side:

1: **for**  $t \in [n]$  **do**

2:   Randomly sample  $i \in [n]$  uniformly and set  $t_{i,0} = 1$

3:   **for**  $j \in \{0\} \cup [p]$  **do**

4:      $t_{i,j} = \prod_{k=jp+1}^{j(p+1)} y_{i,k} \langle w_t, x_{i,k} \rangle$  and  $t_{i,0} = 1$

5:      $s_{i,j} = \prod_{k=jp+1}^{j(p+1)} (1 - y_{i,k} \langle w_t, x_{i,k} \rangle)$  and  $s_{i,p} = 1$

6:   **end for**

7:   Denote  $G(w_t, i) = (\sum_{j=0}^p c_j \binom{p}{j} t_{i,j} s_{i,j}) y_{i,0} x_{i,0}^T$

8:   Update SIGM (Algorithm 7) by  $G(w_t, i)$

9: **end for**

10: Return  $w_n$

---

---

**Algorithm 6** Logistic Loss-NLDP:  $\mathcal{T}_{priv}(\alpha, R, \rho, \epsilon, \delta, D)$

---

**Input:** Private data  $S = \{(x_i, y_i)\}_{i=1}^n \in \mathbb{R}^d \times \{\pm 1\}$ , where  $\|x_i\|_2 \leq R, \|y_i\|_2 \leq 1$ ; Privacy parameters  $\epsilon, \delta$ ; Error  $\alpha$ ; Constraint set  $\mathcal{W} = \{w : \|w\|_2 \leq \rho\}$ .

- 1: Denote the logistic loss with scale  $R\rho$ :  $\ell(w, x, y, R) = \log(1 + e^{-R\rho y \langle w, x \rangle}) = -yh_1(R\rho w^T x) + h_2(R\rho w^T x)$ , where  $h_1(z) = \frac{z}{2}$  and  $h_2(z) = \frac{z}{2} + \log(1 + e^{-z})$ . For the function  $h'_1(R\rho \cdot) : [-1, 1] \mapsto \mathbb{R}$  and  $h'_2(R\rho \cdot) : [-1, 1] \mapsto \mathbb{R}$ , denote the Chebyshev polynomial with degree  $p$  for function  $h'_1(R\rho \cdot)$  and  $h'_2(R\rho \cdot)$  as  $\sum_{i=1}^n c_{1k} x^k$  and  $\sum_{i=1}^n c_{2k} x^k$  respectively, where the degree  $p = O(R \ln \frac{R\rho}{\alpha})$ .

\\ The local user side:

- 2: **for**  $i \in [n]$  **do**
- 3:   Normalize the data  $x'_i = \frac{x_i}{R}$ .
- 4:   Set  $\sigma_{i,0} \sim \mathcal{N}\left(0, \frac{32 \log(1.25/\delta)}{\epsilon^2} \mathbf{I}_d\right)$  and  $z_{i,0} \sim \mathcal{N}\left(0, \frac{32 \log(1.25/\delta)}{\epsilon^2}\right)$
- 5:   Set  $x_{i,0} = x'_i + \sigma_{i,0}$  and  $y_{i,0} = y_i + z_{i,0}$
- 6:   **for**  $j \in [p(p+1)]$  **do**
- 7:      $x_{i,j} = x'_i + \sigma_{i,j}$ , where  $\sigma_{i,j} \sim \mathcal{N}\left(0, \frac{8 \log(1.25/\delta) p^2 (p+1)^2}{\epsilon^2} \mathbf{I}_d\right)$
- 8:   **end for**
- 9:   **for**  $j = p$  **do**
- 10:      $y_{i,j} = y_i + z_{i,j}$ , where  $z_{i,j} \sim \mathcal{N}\left(0, \frac{8 \log(1.25/\delta) p^2}{\epsilon^2}\right)$
- 11:   **end for**
- 12:   Send  $\{x_{i,j}\}_{j=0}^{p(p+1)}$  and  $\{y_{i,j}\}_{j=0}^p$  to the server.
- 13: **end for**

\\ The server side:

- 1: **for**  $t \in [n]$  **do**
  - 2:   Randomly sample  $i \in [n]$  uniformly and set  $t_{i,0} = 1$
  - 3:   **for**  $j = \{0\} \cup [p]$  **do**
  - 4:      $t_j = \prod_{k=\frac{j(j-1)}{2}+1}^{\frac{j(j+1)}{2}} (w_t^T x_{i,k})$
  - 5:   **end for**
  - 6:    $\tilde{G}(w_t; i) = \left( \sum_{k=0}^p (c_{2k} - c_{1k} y_{i,j}) t_k (R\rho)^{k+1} \right) z_0$ .
  - 7:   Update SIGM (Algorithm 7) by  $\tilde{G}(w_t; i)$  to obtain  $w_{t+1}$ .
  - 8: **end for**
  - 9: Return  $w_{n+1}$
-

---

**Algorithm 7** Stochastic Intermediate Gradient Method (SIGM)

---

**Input:** The sequences  $\{\alpha_i\}_{i \geq 0}$ ,  $\{\beta_i\}_{i \geq 0}$ ,  $\{B_i\}_{i \geq 0}$  functions  $d(x) = \frac{\|x\|^2}{2}$ , Bregman distance  $V(x, z) = d(X) - d(Z) - \langle \nabla d(z), x - z \rangle$ .

- 1: Compute  $x_0 = \arg \min_{x \in \mathcal{C}} \{d(x)\}$ .
  - 2: Let  $\xi_0$  be a realization of the random variable  $\xi$ .
  - 3: Compute  $y_0 = \arg \min_{x \in \mathcal{C}} \{\beta_0 d(x) + \alpha_0 \langle G_{\gamma, \beta, \sigma}(x_0; \xi_0), x - x_0 \rangle\}$
  - 4: **for**  $k \in \{0\} \cup [T - 1]$  **do**
  - 5:   Compute  $z_k = \arg \min_{x \in \mathcal{C}} \{\beta_k d(x) + \sum_{i=0}^k \alpha_i \langle G_{\gamma, \beta, \sigma}(x_i; \xi_i), x - x_i \rangle\}$
  - 6:   Let  $x_{k+1} = \eta_k z_k + (1 - \eta_k) y_k$
  - 7:   Let  $\xi_{k+1}$  be a realization of the random variable  $\xi$
  - 8:   Compute  $\hat{x}_{k+1} = \arg \min_{x \in \mathcal{C}} \{\beta_k V(x, z_k) + \alpha_{k+1} \langle G_{\gamma, \beta, \sigma}(x_{k+1}; \xi_{k+1}), x - z_k \rangle\}$
  - 9:   Let  $w_{k+1} = \eta \hat{x}_{k+1} + (1 - \eta) y_k$
  - 10:    $y_{k+1} = \frac{A_{k+1} - B_{k+1}}{A_{k+1}} y_k + \frac{B_{k+1}}{A_{k+1}} w_{k+1}$
  - 11: **end for**
  - 12: Return  $y_T$
-
